# Supplementary material for: The diversity of small non-coding RNAs in the diatom Phaeodactylum tricornutum
Source: PubMed Central journal article supplement (PMC4247016; doi:10.1186/1471-2164-15-698), 2014-08-20

# Additional Figure S1

chr10:426.924–427.420

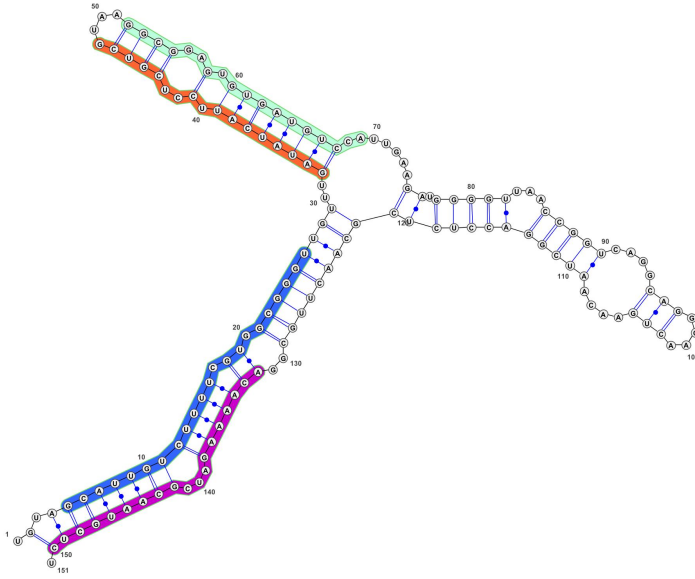

- detected in 3 of our libraries.
- predicted with a miRNA structure by MiReNA with the mature sequence colored in violet (■).
- Two stem loops structures (with the mature sequences in the violet and green: ■■) are compatible with read profiles.
- The green sequence is mainly present in -Fe condition.

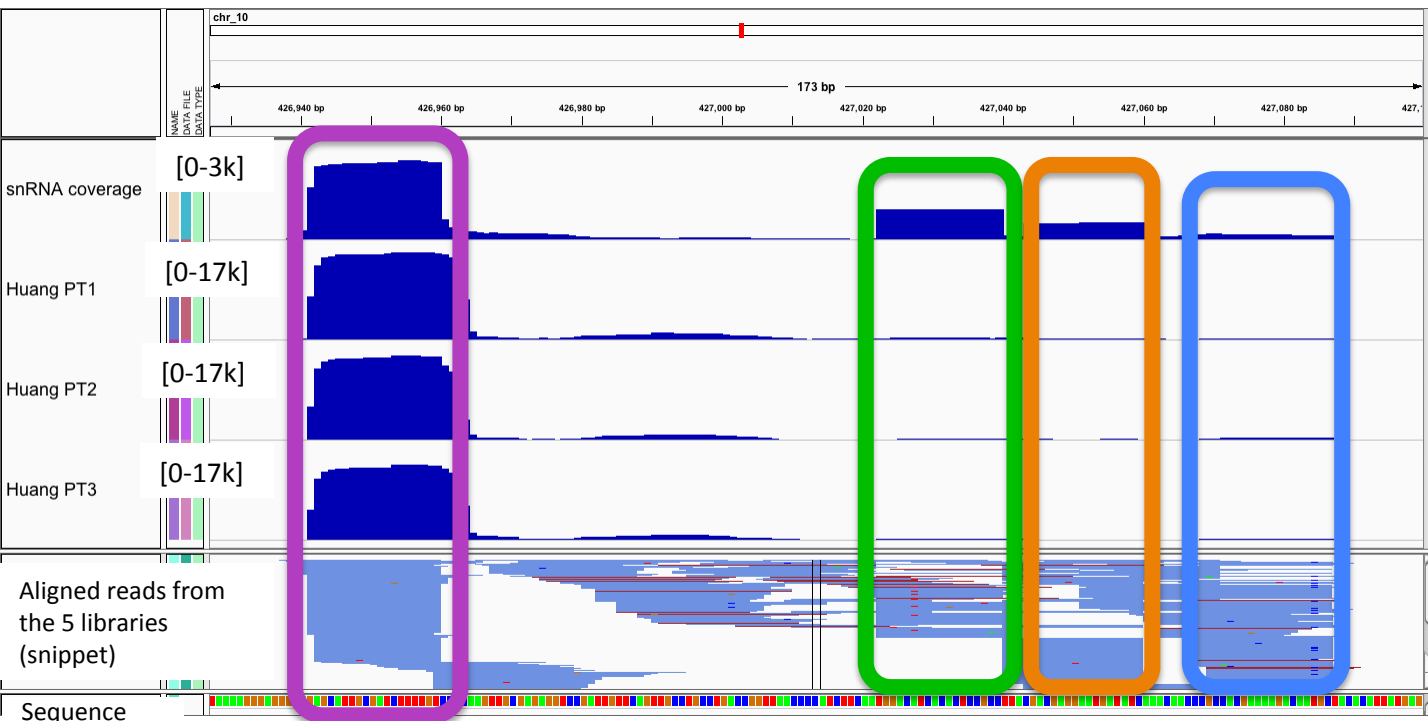

Supplement: 12864_2014_6681_MOESM3_ESM.pdf [file 12864_2014_6681_MOESM3_ESM.pdf]
