# Supplementary material for: The diversity of small non-coding RNAs in the diatom Phaeodactylum tricornutum
Source: PubMed Central journal article supplement (PMC4247016; doi:10.1186/1471-2164-15-698), 2014-08-20

# Additional Figure S2

chr1:2.453.906–2.454.049

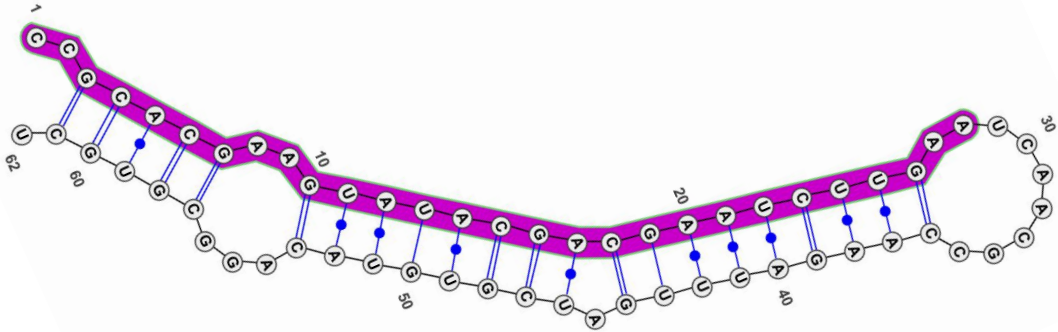

- Detected in 1 library with lower coverage
- Significantly predicted miRNA-like structure, with a stem loop compatible with the reads profile
- No star sequence is detected

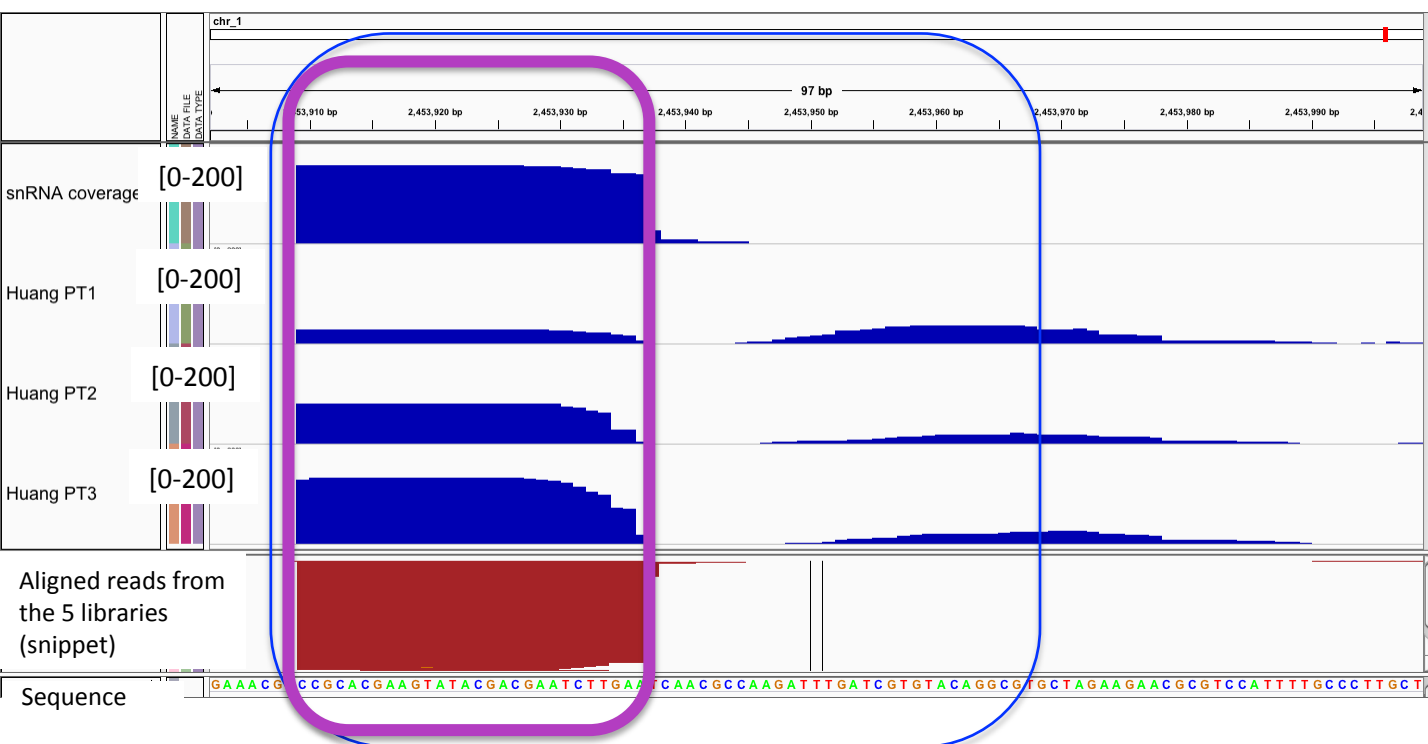

Supplement: 12864_2014_6681_MOESM4_ESM.pdf [file 12864_2014_6681_MOESM4_ESM.pdf]
