# Supplementary material for: The diversity of small non-coding RNAs in the diatom Phaeodactylum tricornutum
Source: PubMed Central journal article supplement (PMC4247016; doi:10.1186/1471-2164-15-698), 2014-08-20
Supplement: 12864_2014_6681_MOESM7_ESM.pdf [file 12864_2014_6681_MOESM7_ESM.pdf]

Additional Table S3

| Amino acid | Anticodon | Coverage all experiments | PPM (prop. per million reads) |        |        |       |       | tRF Pattern    |              |              |             | length 18 |      |      |      |      | Length 19 |      |      |      |      | Length 20 |      |      |      |      | Length 31-35 |      |      |      |      |      |
|------------|-----------|--------------------------|-------------------------------|--------|--------|-------|-------|----------------|--------------|--------------|-------------|-----------|------|------|------|------|-----------|------|------|------|------|-----------|------|------|------|------|--------------|------|------|------|------|------|
|            |           |                          | D                             | Fe     | HL     | LL    | NL    | 5' Dloop-antiC | 3' tRF short | 3' tRFs long | 5' tRF long | D         | Fe   | HL   | LL   | NL   | D         | Fe   | HL   | LL   | NL   | D         | Fe   | HL   | LL   | NL   | D            | Fe   | HL   | LL   | NL   |      |
| Asp        | GTC       | 54 006                   | 2 542                         | 25 213 | 10 336 | 5 761 | 3 548 |                | Y            | Y            |             |           | 0.02 | 0.01 | 0.01 | 0.01 | 0.02      | 0.33 | 0.08 | 0.31 | 0.28 | 0.41      | 0.01 | 0    | 0    | 0.01 | 0            | 0.37 | 0.65 | 0.5  | 0.5  | 0.35 |
| Gly        | GCC       | 18 351                   | 792                           | 5 142  | 7 526  | 1 351 | 3 671 |                | Y            | Fe           |             |           | 0.04 | 0.01 | 0.01 | 0.01 | 0         | 0.36 | 0.13 | 0.77 | 0.57 | 0.72      | 0.03 | 0.02 | 0.04 | 0.03 | 0.03         | 0.23 | 0.54 | 0.08 | 0.19 | 0.13 |
| Gly        | TCC       | 15 474                   | 896                           | 1 915  | 7 055  | 1 659 | 4 325 |                | Y            | Fe           |             |           | 0.03 | 0.02 | 0.01 | 0.01 | 0         | 0.58 | 0.21 | 0.85 | 0.7  | 0.86      | 0.03 | 0.02 | 0.01 | 0.01 | 0.02         | 0.14 | 0.41 | 0.04 | 0.14 | 0.05 |
| Pro        | AGG       | 17 736                   | 858                           | 6 100  | 6 873  | 1 357 | 2 350 |                | Y            | Fe, LL, HL   |             |           | 0.02 | 0.01 | 0.01 | 0.02 | 0.01      | 0.03 | 0.02 | 0.01 | 0.02 | 0.03      | 0.49 | 0.2  | 0.72 | 0.58 | 0.7          | 0.22 | 0.58 | 0.14 | 0.25 | 0.14 |
| Pro        | CGG       | 10 745                   | 398                           | 2 114  | 6 078  | 1 456 | 1 374 |                | Y            |              |             |           | 0.03 | 0.04 | 0.01 | 0.02 | 0.02      | 0.84 | 0.84 | 0.96 | 0.93 | 0.9       | 0.02 | 0.01 | 0    | 0.01 | 0.01         | 0.03 | 0.02 | 0    | 0    | 0.01 |
| Pro        | TGG       | 1 100                    | 46                            | 279    | 462    | 144   | 161   |                | Y            | Fe           |             |           | 0.06 | 0.07 | 0.04 | 0.04 | 0.06      | 0.5  | 0.69 | 0.86 | 0.75 | 0.8       | 0.09 | 0.02 | 0.02 | 0.04 | 0.04         | 0.06 | 0.05 | 0.02 | 0.05 | 0.02 |
| Phe        | GAA       | 10 703                   | 1 804                         | 1 159  | 2 287  | 1 703 | 2 309 |                | Y            |              |             |           | 0    | 0.01 | 0.01 | 0    | 0.01      | 0.75 | 0.56 | 0.67 | 0.81 | 0.65      | 0.01 | 0.06 | 0.01 | 0.01 | 0.01         | 0    | 0    | 0    | 0    | 0    |
| His        | GTG       | 9 352                    | 362                           | 4 488  | 2 098  | 523   | 1 071 |                | Y            | Fe, LL       |             |           | 0    | 0.01 | 0.01 | 0    | 0         | 0.21 | 0.11 | 0.64 | 0.41 | 0.46      | 0.02 | 0.01 | 0.01 | 0.01 | 0.02         | 0.53 | 0.73 | 0.27 | 0.42 | 0.35 |
| Val        | AAC       | 6 258                    | 590                           | 1 254  | 2 165  | 955   | 921   |                | Y            | Fe           |             |           | 0.01 | 0.03 | 0.01 | 0.01 | 0.01      | 0.58 | 0.78 | 0.76 | 0.73 | 0.69      | 0.1  | 0.02 | 0.03 | 0.02 | 0.04         | 0.02 | 0.03 | 0    | 0    | 0.03 |
| Val        | CAC       | 4 790                    | 245                           | 1 214  | 1 958  | 691   | 583   |                | Y            | Fe           |             |           | 0.01 | 0.01 | 0    | 0    | 0.01      | 0.81 | 0.93 | 0.96 | 0.93 | 0.91      | 0.07 | 0.01 | 0.01 | 0.01 | 0.01         | 0.01 | 0.01 | 0.01 | 0.01 | 0.01 |
| Val        | TAC       | 473                      | 71                            | 75     | 96     | 101   | 54    |                | Y            | Y            |             |           | 0.19 | 0.17 | 0.03 | 0.04 | 0.03      | 0.2  | 0.1  | 0.05 | 0.03 | 0.07      | 0.14 | 0.36 | 0.61 | 0.65 | 0.48         | 0    | 0.03 | 0.04 | 0.01 | 0.02 |
| Glu        | CTC       | 6 201                    | 933                           | 1 309  | 1 866  | 653   | 956   |                | Y            |              | Y           |           | 0.05 | 0.05 | 0.04 | 0.05 | 0.04      | 0.1  | 0.05 | 0.07 | 0.06 | 0.08      | 0.06 | 0.02 | 0.04 | 0.06 | 0.05         | 0.24 | 0.48 | 0.24 | 0.23 | 0.25 |
| Glu        | TTC       | 2 928                    | 274                           | 1 443  | 489    | 185   | 153   |                | Y            | Y            |             |           | 0.49 | 0.63 | 0.49 | 0.52 | 0.4       | 0.26 | 0.21 | 0.2  | 0.18 | 0.27      | 0.18 | 0.03 | 0.08 | 0.05 | 0.09         | 0.05 | 0.07 | 0.1  | 0.07 | 0.07 |
| Ala        | AGC       | 5 423                    | 397                           | 1 176  | 1 014  | 840   | 1 298 |                | Y            | Fe           |             |           | 0.08 | 0.03 | 0.04 | 0.03 | 0.02      | 0.1  | 0.12 | 0.06 | 0.03 | 0.05      | 0.54 | 0.5  | 0.66 | 0.78 | 0.75         | 0.01 | 0.04 | 0    | 0.01 | 0.01 |
| Ala        | CGC       | 4 143                    | 171                           | 568    | 1 570  | 789   | 881   |                | Y            |              |             |           | 0    | 0.02 | 0    | 0    | 0         | 0.52 | 0.54 | 0.91 | 0.86 | 0.77      | 0.07 | 0.05 | 0.01 | 0.01 | 0.03         | 0.04 | 0.07 | 0.01 | 0.01 |      |
| Ala        | TGC       | 1 061                    | 62                            | 489    | 254    | 101   | 50    |                | Y            |              | Fe          |           | 0.27 | 0.17 | 0.09 | 0.07 | 0.04      | 0.02 | 0.01 | 0.01 | 0.01 | 0.07      | 0.28 | 0.05 | 0.03 | 0.08 | 0.16         | 0.07 | 0.47 | 0.36 | 0.44 | 0.18 |
| Gln        | CTG       | 4 780                    | 844                           | 637    | 1 908  | 500   | 732   |                | Y            | Y            | Y           |           | 0.03 | 0.04 | 0.03 | 0.07 | 0.03      | 0.05 | 0.06 | 0.03 | 0.05 | 0.02      | 0.09 | 0.16 | 0.48 | 0.44 | 0.31         | 0.36 | 0.39 | 0.12 | 0.17 | 0.16 |
| Gln        | TTG       | 1 025                    | 132                           | 180    | 338    | 153   | 148   |                | Y            | Y            |             |           | 0.42 | 0.21 | 0.07 | 0.22 | 0.05      | 0.27 | 0.43 | 0.74 | 0.52 | 0.68      | 0.03 | 0.13 | 0.05 | 0.07 | 0.06         | 0.03 | 0.02 | 0.03 | 0.01 | 0.02 |
| Ser        | GCT       | 4 155                    | 377                           | 991    | 1 131  | 561   | 727   |                | Y            | Y            | Fe          |           | 0.18 | 0.08 | 0.04 | 0.04 | 0.06      | 0.38 | 0.5  | 0.72 | 0.77 | 0.65      | 0.02 | 0.02 | 0.02 | 0.01 | 0.02         | 0.07 | 0.1  | 0.06 | 0.02 | 0.05 |
| Ser        | AGA       | 1 474                    | 91                            | 754    | 280    | 85    | 100   |                | Y            |              |             |           | 0.22 | 0.5  | 0.15 | 0.15 | 0.09      | 0.27 | 0.27 | 0.43 | 0.44 | 0.55      | 0.13 | 0.02 | 0.06 | 0.07 | 0.13         | 0    | 0    | 0.01 | 0    | 0.01 |
| Ser        | CGA       | 900                      | 95                            | 145    | 335    | 162   | 111   |                |              |              |             |           | 0.2  | 0.29 | 0.1  | 0.1  | 0.06      | 0.18 | 0.23 | 0.11 | 0.08 | 0.07      | 0.07 | 0.05 | 0.35 | 0.15 | 0.26         | 0.01 | 0.02 | 0.01 | 0    | 0.07 |
| Ser        | TGA       | 478                      | 52                            | 170    | 94     | 59    | 40    |                |              |              |             |           | 0.49 | 0.37 | 0.14 | 0.23 | 0.29      | 0.14 | 0.35 | 0.62 | 0.45 | 0.49      | 0.03 | 0.01 | 0.07 | 0.01 | 0.04         | 0.02 | 0.01 | 0    | 0.01 | 0    |
| Arg        | TCG       | 3 892                    | 194                           | 1 157  | 1 528  | 357   | 613   |                | Y            | Fe, HL, NL   |             |           | 0    | 0    | 0    | 0.01 | 0.01      | 0.13 | 0.2  | 0.55 | 0.32 | 0.35      | 0.04 | 0.04 | 0.01 | 0.03 | 0.02         | 0.14 | 0.31 | 0.17 | 0.12 | 0.12 |
| Arg        | CCT       | 462                      | 20                            | 60     | 249    | 66    | 92    |                |              |              |             |           | 0.07 | 0.07 | 0.01 | 0.04 | 0.03      | 0.36 | 0.36 | 0.77 | 0.54 | 0.66      | 0.07 | 0.03 | 0.01 | 0.02 | 0.02         | 0    | 0.02 | 0.02 | 0.02 | 0.02 |
| Arg        | CCG       | 436                      | 16                            | 114    | 182    | 68    | 49    |                |              |              |             |           | 0.09 | 0.02 | 0.02 | 0.02 | 0.04      | 0.13 | 0.16 | 0.63 | 0.21 | 0.36      | 0.09 | 0.06 | 0.06 | 0.03 | 0.05         | 0    | 0.02 | 0.04 | 0.02 | 0    |
| Arg        | TCT       | 256                      | 14                            | 117    | 41     | 20    | 33    |                |              |              |             |           | 0    | 0.03 | 0.08 | 0.03 | 0.19      | 0    | 0.01 | 0    | 0.06 | 0         | 0    | 0.03 | 0.04 | 0.03 | 0.05         | 0.05 | 0.1  | 0.12 | 0.09 | 0.14 |
| Thr        | TGT       | 3 632                    | 897                           | 596    | 725    | 552   | 265   |                | Y            | Y            | Y           |           | 0.13 | 0.06 | 0.04 | 0.06 | 0.05      | 0    | 0.02 | 0.02 | 0.02 | 0.04      | 0.62 | 0.19 | 0.35 | 0.4  | 0.48         | 0.11 | 0.54 | 0.35 | 0.25 | 0.1  |
| Thr        | AGT       | 1 717                    | 139                           | 366    | 405    | 249   | 380   |                | Y            | Y            | Fe          |           | 0.12 | 0.07 | 0.06 | 0.06 | 0.04      | 0.38 | 0.32 | 0.6  | 0.66 | 0.61      | 0.03 | 0.05 | 0.06 | 0.04 | 0.06         | 0.05 | 0.14 | 0.05 | 0.04 | 0.02 |
| Thr        | CGT       | 643                      | 57                            | 155    | 291    | 59    | 88    |                |              | HL           | Fe, HL      |           | 0.09 | 0.06 | 0.07 | 0.11 | 0.1       | 0.12 | 0.07 | 0.37 | 0.08 | 0.1       | 0.11 | 0.07 | 0.08 | 0.04 | 0.07         | 0.09 | 0.51 | 0.23 | 0.22 | 0.11 |
| Leu        | CAA       | 2 359                    | 257                           | 499    | 788    | 272   | 412   |                | Y            | Y            |             |           | 0.08 | 0.07 | 0.04 | 0.04 | 0.05      | 0.17 | 0.15 | 0.25 | 0.26 | 0.32      | 0.21 | 0.13 | 0.1  | 0.11 | 0.13         | 0    | 0.01 | 0.01 | 0.02 | 0    |
| Leu        | CAG       | 1 001                    | 61                            | 226    | 445    | 147   | 117   |                |              |              |             |           | 0.18 | 0.08 | 0.07 | 0.07 | 0.05      | 0.05 | 0.08 | 0.19 | 0.17 | 0.14      | 0.03 | 0.1  | 0.06 | 0.12 | 0.09         | 0.06 | 0.11 | 0.1  | 0.11 | 0.12 |
| Leu        | AAG       | 956                      | 60                            | 170    | 257    | 115   | 286   |                |              | Y            |             |           | 0.47 | 0.34 | 0.08 | 0.03 | 0.02      | 0.02 | 0.12 | 0.03 | 0.02 | 0.03      | 0.12 | 0.24 | 0.77 | 0.64 | 0.73         | 0.12 | 0.1  | 0.03 | 0.05 | 0.06 |
| Leu        | TAG       | 886                      | 77                            | 127    | 413    | 87    | 203   |                |              | Y            |             |           | 0.33 | 0.18 | 0.03 | 0.01 | 0.03      | 0.42 | 0.31 | 0.87 | 0.81 | 0.83      | 0.09 | 0.09 | 0.03 | 0.03 | 0.02         | 0.08 | 0.19 | 0.02 | 0.02 | 0.05 |
| Leu        | TAA       | 731                      | 61                            | 139    | 263    | 84    | 158   |                |              |              |             |           | 0.2  | 0.22 | 0.08 | 0.08 | 0.04      | 0.09 | 0.09 | 0.07 | 0.05 | 0.04      | 0.2  | 0.23 | 0.71 | 0.43 | 0.67         | 0.25 | 0.16 | 0.11 | 0.16 | 0.1  |
| Tyr        | GTA       | 1 435                    | 91                            | 288    | 413    | 263   | 251   |                | Y            | Fe           |             |           | 0.15 | 0.15 | 0.11 | 0.13 | 0.07      | 0.18 | 0.17 | 0.09 | 0.1  | 0.1       | 0.15 | 0.28 | 0.19 | 0.12 | 0.11         | 0.04 | 0.01 | 0.06 | 0.02 | 0.1  |
| Met        | CAT       | 1 368                    | 125                           | 205    | 533    | 214   | 242   |                |              |              |             |           | 0.02 | 0.06 | 0.03 | 0.02 | 0.01      | 0.1  | 0.05 | 0.02 | 0.06 | 0.05      | 0.04 | 0.09 | 0.13 | 0.05 | 0.03         | 0.01 | 0.03 | 0.02 | 0.03 | 0.03 |
| Asn        | GTT       | 1 345                    | 96                            | 333    | 517    | 157   | 207   |                |              |              |             |           | 0.14 | 0.18 | 0.06 | 0.06 | 0.05      | 0.27 | 0.27 | 0.64 | 0.49 | 0.58      | 0.2  | 0.23 | 0.06 | 0.09 | 0.09         | 0.05 | 0.02 | 0.01 | 0.04 | 0.02 |
| Trp        | CCA       | 1 317                    | 90                            | 155    | 475    | 295   | 216   |                | Y            |              |             |           | 0.16 | 0.21 | 0.12 | 0.06 | 0.21      | 0.03 | 0.06 | 0.01 | 0.03 | 0.02      | 0.55 | 0.37 | 0.66 | 0.61 | 0.55         | 0.03 | 0.07 | 0.03 | 0.04 | 0.04 |
| SeC        | TCA       | 1 282                    | 93                            | 610    | 229    | 90    | 104   |                |              |              |             |           | 0.01 | 0.03 | 0.02 | 0.03 | 0.03      | 0.04 | 0.02 | 0.03 | 0.01 | 0.04      | 0.06 | 0.03 | 0.14 | 0.12 | 0.06         | 0.16 | 0.17 | 0.28 | 0.23 | 0.14 |
| Lys        | CTT       | 612                      | 31                            | 157    | 271    | 87    | 62    |                |              |              |             |           | 0.09 | 0.15 | 0.07 | 0.08 | 0.17      | 0.04 | 0.05 | 0.06 | 0.07 |           |      |      |      |      |              |      |      |      |      |      |
