# Supplementary material for: The diversity of small non-coding RNAs in the diatom Phaeodactylum tricornutum
Source: PubMed Central journal article supplement (PMC4247016; doi:10.1186/1471-2164-15-698), 2014-08-20

# Additional Figure S6

A

sRNA coverage

chr5: 648.000 - 653.000

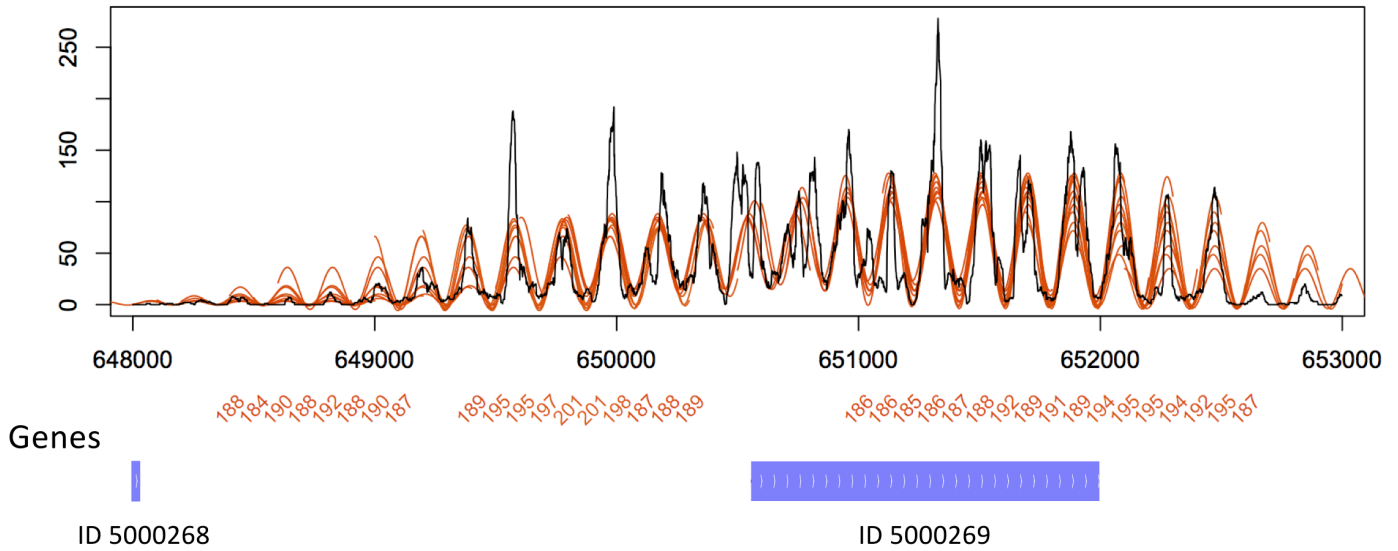

B

sRNA coverage

chr7: 929.000 - 934.000

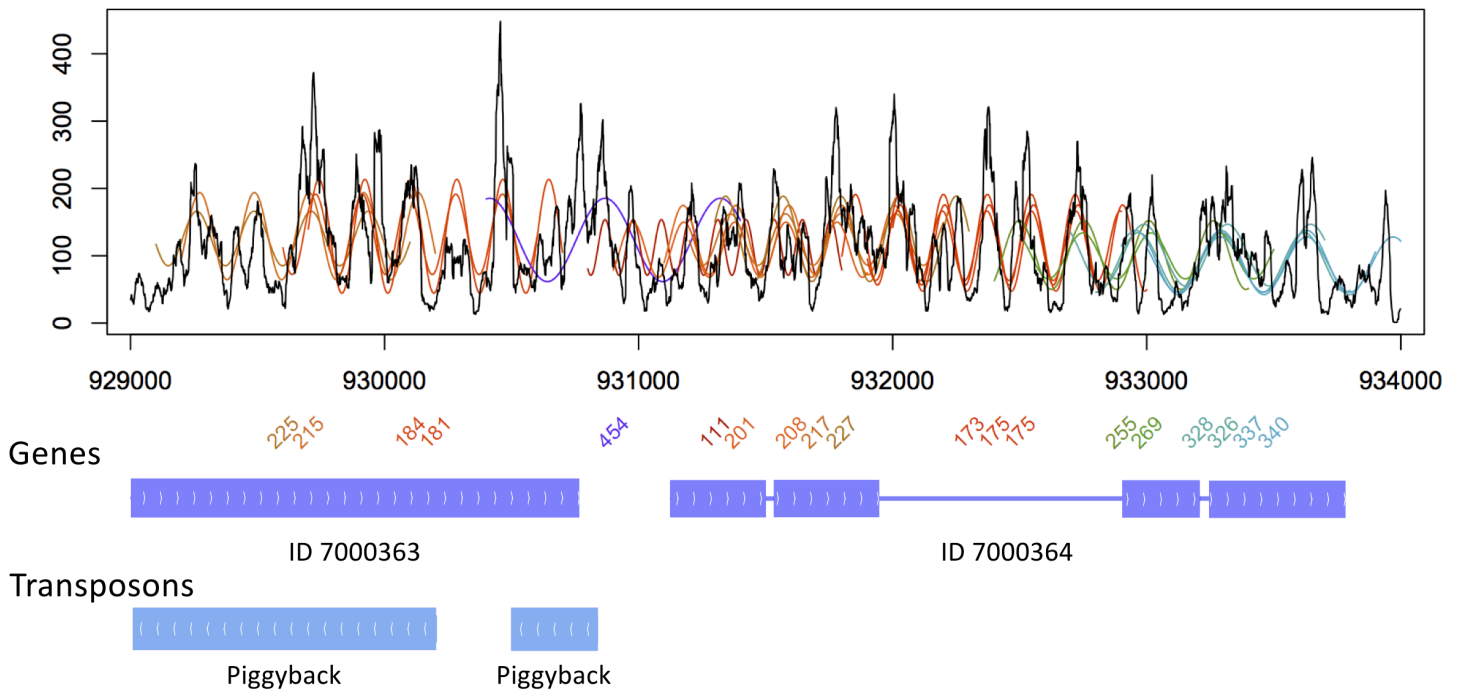

Supplement: 12864_2014_6681_MOESM10_ESM.pdf [file 12864_2014_6681_MOESM10_ESM.pdf]
