# Supplementary material for: The diversity of small non-coding RNAs in the diatom Phaeodactylum tricornutum
Source: PubMed Central journal article supplement (PMC4247016; doi:10.1186/1471-2164-15-698), 2014-08-20
Supplement: 12864_2014_6681_MOESM11_ESM.pdf [file 12864_2014_6681_MOESM11_ESM.pdf]

## Additional Table S4

### OLIGOPROBES

|                     |                               |
|---------------------|-------------------------------|
| U2 snRNA            | GTACACGGTCAAGGCGGTGAGTG       |
| U6                  | GCTAATCTTCTCTGTATC            |
| chr_2:29.039-29.123 | AAATGTTTCGAGAGAGAAAATTACAAAGA |
| Asp-GAC             | TCCGACACGGGGAATCGA            |
| Gly-GGC             | GCGCCATCCGGGAATCGA            |
| Pro-CCT             | GGTCCAAGCCGGGAATCGA           |
| Glu-GAG             | CGTCGTATGATAACCACC            |

### qRT-PCR

#### Transposons

|                                  |                      |
|----------------------------------|----------------------|
| EU432476_chr_18:652040-658588 Fw | GCCACTCAGCCTCCTCCTA  |
| EU432476_chr_18:652040-658588 Rv | TACTGCACAGAAGCACGGTT |
| EU432476_chr_3:105711-112245 Fw  | GCTCCTGGGGAGTCACAAGT |
| EU432476_chr_3:105711-112245 Rv  | AGAGAAGACACGCCATTCGG |
| EU432478_chr_13:47329-55017 Fw   | CTAGTGTGCGTTCGCTTTG  |
| EU432478_chr_13:47329-55017 Rv   | CCCATCATCGTGCCTCCAAT |
| EU432481_chr_4:346-7718 Fw       | TGATACTGGTGCAGACACCG |
| EU432481_chr_4:346-7718 Rv       | AATGAGCGAGGTGGTCTGTG |
| EU432484_chr_19:625550-631655 Fw | CTTGGGAGGAGCTTCGAGA  |
| EU432484_chr_19:625550-631655 Rv | ATGCCGAAGTGTCTCGTGT  |
| EU432486_chr_14:400706-405979 Fw | ATCACTCTCGACCGGTAAC  |
| EU432486_chr_14:400706-405979 Rv | CATTGGTGGGTGAAACAGCG |

|             |                            |
|-------------|----------------------------|
| snRNA U2 Fw | TTCGCCTTATTGGCTTTGAT       |
| snRNA U2 Rv | GTACAGGGTCAAGGCGGTGAG      |
| Rps Fw      | GTGCAAGAGACCGGACATACC      |
| Rps Rv      | CGAAGTCAACCAGGAAACCAA      |
| H4 Fw       | TATGAGCTCGCAATCTCACGCACCAG |
| H4 Rv       | CATCCATGGCTGTTGTTTGTTCG    |
| Sh ble 1 Fw | AGGGTACCCATGGCCAAGTT       |
| Sh ble1 Rv  | GATGAACAGGGTCACGTCGTC      |

#### 5' and 3' RACE PCR snRNA U2

|         |                      |
|---------|----------------------|
| 3'outer | TTCGCCTTATTGGCTTTGAT |
| 3'inner | ATTTCACTCACCGCCTTGAC |
| 5'outer | GTCAAGGCGGTGAGTAAAAT |
| 5'inner | TCAAAGCCAATAAGGCGAAG |

#### STEM LOOP qPCR

|                                |                       |
|--------------------------------|-----------------------|
| Universal Reverse PCR primer : | AGTGCAGGGTCCGAGGTATTC |
|--------------------------------|-----------------------|

#### U2 snRNA

|                            |                                                    |
|----------------------------|----------------------------------------------------|
| RT-loop primer U2-3' snRNA | GTCGTATCCAGTGCAGGGTCCGAGGTATTCGCACTGGATACGACGTACAC |
| Forward U2-3'primer        | GTCGTATCCAGTGCAGGGTCCGAGGTATTCGCACTGGATACGACGTACAC |

|                            |                                                    |
|----------------------------|----------------------------------------------------|
| RT-loop primer U2-5' snRNA | GTCGTATCCAGTGCAGGGTCCGAGGTATTCGCACTGGATACGACGTACAC |
| Forward U2-5'primer        | CCGGCGATTGGCTTTGATCTT                              |

|                         |                         |
|-------------------------|-------------------------|
| RT-loop primersnoRNAR85 |                         |
| Forward SnoRNAR85       | GTGCATTCAAAGCCCTTACATGT |
